# Supplementary material for: A Study of the Coevolution of Digital Organisms with an Evolutionary Cellular Automaton
Source: MDPI journal article supplement (doi:10.3390/biology10111147), 2021-11-07
Supplement: s1 [file s1]

| Initial state                                               | Represents                            | Process                                                                                                                                                                                                                                                                                                                                                                                                               | What happens                                                                                                                                                                                                                                                                                                                                                      | Why it happens                                                                                                                                                                                                                                                                                                                                                               | Reference            |
|-------------------------------------------------------------|---------------------------------------|-----------------------------------------------------------------------------------------------------------------------------------------------------------------------------------------------------------------------------------------------------------------------------------------------------------------------------------------------------------------------------------------------------------------------|-------------------------------------------------------------------------------------------------------------------------------------------------------------------------------------------------------------------------------------------------------------------------------------------------------------------------------------------------------------------|------------------------------------------------------------------------------------------------------------------------------------------------------------------------------------------------------------------------------------------------------------------------------------------------------------------------------------------------------------------------------|----------------------|
| <a href="#">1LCFY.json</a>                                  | Law of Constant Final Yield           | Intraspecific competition: organisms of the same species compete for the scarce resources of each cell.                                                                                                                                                                                                                                                                                                               | The amount of resources in each cell controls the growth rate of the species.                                                                                                                                                                                                                                                                                     | By increasing 100 resources in each of the 100 cells, the organisms that survive (carrying capacity) in each generation increase by $100 \times 100 = 10.000$                                                                                                                                                                                                                | [43,44]              |
| <a href="#">1Pred.json</a>                                  | Simple predation                      | Predator <i>Neodiprion sertifer</i> eats its prey (the resources)                                                                                                                                                                                                                                                                                                                                                     | Numerical answer: if resources increase, <i>N. sertifer</i> increases.<br>Functional answer: if you increase both resources and Fitness direct <i>N. sertifer</i> increases                                                                                                                                                                                       | By increasing the resources in each patch, <i>N. sertifer</i> is adjusted by increasing its number. <i>N. sertifer</i> is adjusted per patch. The load capacity does not run out if the distribution aggregated (100r)                                                                                                                                                       | [46]                 |
| <a href="#">1Amen.json</a>                                  | Amensalism (with cost)                | <i>Eucalyptus</i> sp. competes with other plants for resources.                                                                                                                                                                                                                                                                                                                                                       | <i>Eucalyptus</i> sp. secretes a substance that prevents and hinders the development of other plants.                                                                                                                                                                                                                                                             | <i>Eucalyptus</i> sp. and other plants have the same Direct fitness, but when they interact, eucalyptus, at a cost to him (his Indirect fitness) makes other plants have less offspring. <i>Eucalyptus</i> prevails.                                                                                                                                                         | Deducted by the user |
| <a href="#">1Amen2.json</a>                                 | Amensalism                            | Two <i>Saccharomyces cerevisiae</i> yeast strains: a killer strain and a sensitive strain.                                                                                                                                                                                                                                                                                                                            | The killer prevails at equal fitness. Although the interaction can stay a long time if the punishments are few.                                                                                                                                                                                                                                                   | The killer reduces the fitness of the sensitive. If both species coexist in a cell, most are grouped (high flexibility for the killer) and have the same fitness as ungrouped, but there is any non-clustered sensitive, it is punished. All groupings are undone (minimum flexibility for the group).                                                                       | [69]                 |
| <a href="#">1Exclu.json</a>                                 | Competitive exclusion principle       | Two species competing for the same limited resource cannot coexist at constant population values.                                                                                                                                                                                                                                                                                                                     | <i>Paramecium aurelia</i> and <i>Paramecium caudatum</i> . After a phase of neutrality <i>P. aurelia</i> systematically led to <i>P. caudatum</i> extinction.                                                                                                                                                                                                     | <i>P. aurelia</i> has more fitness than <i>P. caudatum</i> , 7 to 4 offspring                                                                                                                                                                                                                                                                                                | [49]                 |
| <a href="#">1Intra.json</a>                                 | Intraspecific competition             | Organisms of a species sp. compete with each other for the scarce resources of each cell                                                                                                                                                                                                                                                                                                                              | The number of organisms increases until the carrying capacity, from there only some organisms survive and have offspring.                                                                                                                                                                                                                                         | By natural selection, only a few can survive because resources are limited                                                                                                                                                                                                                                                                                                   | Deducted by the user |
| <a href="#">1Neu.json</a>                                   | Neutralism                            | Describes the relationship between two species that interact but do not affect each other.                                                                                                                                                                                                                                                                                                                            | Species SP1 and SP2 interact with each other, but neither benefit nor harm                                                                                                                                                                                                                                                                                        | Both species are related but nothing is given.                                                                                                                                                                                                                                                                                                                               | [50]                 |
| <a href="#">1Para.json</a>                                  | Brood parasites                       | The cuckoo ( <i>Cuculus canorus</i> ) deposits an egg in the reed warbler's nest ( <i>Acrocephalus arundinaceus</i> ), and it breeds it as its own.                                                                                                                                                                                                                                                                   | It is an extinct interaction because the cuckoo eliminates the eggs of the reed warbler. The reed warbler extinguishes and extinguishes the cuckoo.                                                                                                                                                                                                               | The interaction is maintained if the cuckoo/reed warbler ratio is low and there is a great fragmentation of habitat because it gives time to regenerate the reed warblers.                                                                                                                                                                                                   | [47,48]              |
| <a href="#">1Comm.json</a>                                  | Commensalism (Phoresy)                | One of the species obtains a benefit, the other neither benefits nor is harmed.                                                                                                                                                                                                                                                                                                                                       | Sharksucker is grouped with Shark. The sharksucker has a benefit in transport and food (more offspring) while the shark has no benefit or loss for the interaction.                                                                                                                                                                                               | When both species are found, both form a group (maximum flexibility of shark), the created group consumes and reproduces before ungrouping (minimum group flexibility). In the grouping, sharksucker has more offspring than if it had not been grouped.                                                                                                                     | [51]                 |
| <a href="#">1Colab.json</a>                                 | Intraspecific social collaboration    | Three species of bees compete in a habitat: An eusocial - <i>Apis mellifera</i> - that without associating with those of its same species cannot live; another that is associated but can live individually; and another that is never associated.                                                                                                                                                                    | With a small population, they usually become extinct in this order: eusocial < collaborators < individual. If the population is large enough, the three species of bees are kept alive for many generations.                                                                                                                                                      | When they are odd numbers, the collaborators and the eusocials have an unpaired in each cell, losing offspring concerning the individual ones. This effect is diminished when the population is large and when there is little fragmentation of the habitat. In this case, the species compete in genetic drift and can be in balance for many generations (more than 5000). | [71,72]              |
| <a href="#">1Eu2.json</a>                                   | Multilevel selection vs kin selection | Two species of eusocial bees compete with solitary bees. One of the eusocials is associated following the kin selection theory, and the other is grouped following the multilevel selection theory.                                                                                                                                                                                                                   | If there is no eusociality or there is no more fitness with eusociality, the species are in equilibrium (1 and 2). Only when there are advantages in eusociality (one more descendant) do eusocials prevail (3,4 and 5). For the grouped species to prevail, they must all be grouped by setting the Phenotypic Flexibility to the maximum (6 and 7).             | Cooperation in itself does not give advantages, only if it provides more fitness is selected. Those who do not group due to low phenotypic flexibility have fewer offspring and decrease their biotic potential in the grouping. In contrast, in the association, all associate and have the maximum offspring from the beginning.                                           | [73]                 |
| <a href="#">1Symb.json</a>                                  | Symbiosis or obligate mutualism       | In the islands of Japan, a stinkbug and six distinct bacterial lineages associated with insect populations interact. The bugs are associated with obligate microbial mutualists on an island, and on other islands, bacteria are parasitized. If the bacteria have a common ancestor and are functionally equal to the bug, it is suggested that such essential symbionts have originated from free-living ancestors. | On each island, one type of interaction is positively selected. One uncultivable symbiont is fixed in temperate populations, and the other uncultivable symbiont coexists with four culturable symbionts subtropical populations.                                                                                                                                 | When the bacteria are free-living, the interaction works as in parasitism. When there is obligate mutualism, the bacteria can only live as an endosymbiont, and without associating, it dies. $Df = If = 0$ .                                                                                                                                                                | [17]                 |
| <a href="#">1Deri.json</a>                                  | Genetic drift (in genes)              | Two alleles (A and B) can be in homozygosity (AA and BB), or in heterozygosity (AB).                                                                                                                                                                                                                                                                                                                                  | They start with the same frequency, but as the generations advance, they vary in frequency. If the number of alleles becomes small enough, one allele may disappear, the other one being fixed, without a single heterozygous locus.                                                                                                                              | For sampling errors, allele frequencies vary. If we decrease sufficiently the number of alleles, any of the alleles can disappear. For example, if we go from 200 loci to 10 loci, the allele A or allele B, is extinguished, making the genes homozygous.                                                                                                                   | [77,78]              |
| <a href="#">1DeriSp.json</a>                                | Ecological drift (in species)         | Two species, A and B, compete in a habitat with 100 patches. They have equal fitness and equal frequency.                                                                                                                                                                                                                                                                                                             | Frequencies A and B vary to happen generations. If the populations become small enough, any of them may disappear.                                                                                                                                                                                                                                                | Sampling errors vary the frequencies of the populations.                                                                                                                                                                                                                                                                                                                     | [72]                 |
| <a href="#">1Hardy.json</a>                                 | Hardy-Weinberg principle              | This principle states that allele and genotype frequencies in a population will remain constant from generation to generation in the absence of genetic drift, mate choice, assortative mating, natural selection, sexual selection, mutation, gene flow, meiotic drive, genetic hitchhiking, population bottleneck, founder effect and inbreeding.                                                                   | The frequencies of alleles and genotypes are kept constant, for three alleles, until it reaches the limit of alleles that fit in the patch.                                                                                                                                                                                                                       | As in the previous case of genetic drift, the frequency of allele populations does not vary until natural selection appears.                                                                                                                                                                                                                                                 | [70]                 |
| <a href="#">1Pavo3.json</a> and <a href="#">1Pavo2.json</a> | Kin selection (1)                     | In <i>Meleagris gallopavo</i> , pairs of males of the same age form coalitions to woo females and defend those females from other males. Only the dominant male has offspring. The males of these coalitions have a kinship coefficient of 0.42 (close to r of full siblings). Dominant males (in pairs) mate with more females and leave more offspring on average than solitary males (9 vs. 0.7 offspring).        | We start from two male turkey lineages: those that form a dominant and subordinate male coalition and those that are solitary. On average, the coalition has more offspring (2, 3 offspring). The resources of each cell represent female turkeys, and each cell represents a nuptial display site or lek. The lineage of the solitaires is quickly extinguished. | The fitness of the turkey coalitions is higher and, by competition, excludes the lineage of the solitaires.                                                                                                                                                                                                                                                                  | [81]                 |
| <a href="#">1Squi.json</a>                                  | Kin selection (2)                     | There were five adoptions among 2,230 litters over 19 years, in asocial red squirrels ( <i>Tamiasciurus hudsonicus</i> ). Adoptions were always between kin, while orphans without nearby kin were never adopted. It is unclear why an adopting parent should incur the costs of rearing extra young, if not by applying Hamilton's rule $rB > C$                                                                     | We implement a model relative to the data collected in the research. The factor Q (implemented as a species that is not extinct and whose population is one organism in all generations) causes an additional organism (A) (adopted) to survive. In contrast, species B does not have this advantage.                                                             | Both species compete in 40 simulations for 10,000 years (2,631 generations). A survives B in 18 simulations, B to A in 13 simulations, and both remain in 9 simulations.                                                                                                                                                                                                     | [82]                 |
| <a href="#">1Sex2.json</a> and <a href="#">1Sex3.json</a>   | The evolution of sex                  | One sexual species competes with another asexual. Male and female singles do not have offspring. If they associate they have 4 offspring, just like asexuals.                                                                                                                                                                                                                                                         | If there are no pathogens ("NumberOfItems" = 0) or the epidemic ends, asexuals prevail. If the pathogen is more lethal or more contagious among asexuals, sexual ones prevail.                                                                                                                                                                                    | Due to the Quorum decreasing effect (singles do not have offspring), asexuals always prevail, unless external factors, such as a pathogen or virus, act.                                                                                                                                                                                                                     | [87]                 |
| <a href="#">1Fish.json</a>                                  | Fisher's principle                    | The Fisher principle shows that the 1:1 ratio sex is the evolutionarily stable strategy (ESS)                                                                                                                                                                                                                                                                                                                         | We simulate three sexual populations with the same fitness. Male and female singles do not have offspring. If they associate, they have six offspring, but in different ratios: 3:3, 2:4, and 4:2. According to Fisher's principle, the 3:3 ratio always prevails.                                                                                                | The bias between males and females is more significant when the sex ratio is not 1:1, so the "quorum decreasing" effect is greater and more singles do not have offspring.                                                                                                                                                                                                   | [93]                 |
| <a href="#">1Proto.json</a>                                 | Proto-Cooperation                     | Three predators (SP1, SP2 and SP3) compete for prey (the resources of the 100 cells). SP1 and SP2 can collaborate and get one more descendant, SP3 cannot.                                                                                                                                                                                                                                                            | Non-cooperating SP3 species becomes extinct                                                                                                                                                                                                                                                                                                                       | Proto-cooperation gives more fitness (one more descendant) ends up extinguishing the one that does not cooperate due to competitive exclusion                                                                                                                                                                                                                                | [52]                 |

Law of Constant Final Yield

Intraspecific Competition

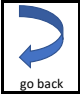

|                          |                                                                                                |
|--------------------------|------------------------------------------------------------------------------------------------|
| Training dataset         | [43,44]                                                                                        |
| Initial State Name       | 1LCFY.json                                                                                     |
| Terminal Command or Rank | rae4.py --outDir=1LCFY Paper1/1LCFY --setRandomSeed=1 --NumberOfRsrcsInEachCell=[100:1000:100] |
| Simulation data          | Sheet 1LCFYdata                                                                                |

```
1 {
2   "NumberOfCells": 100,
3   "NumberOfRsrcsInEachCell": 100,
4   "MultilevelDeath1Percent": 0.00,
5   "LambdaForEgoism": 0.0,
6   "Distribution": "100n",
7   "species": [
8     {
9       "id": "A",
10      "NumberOfItems": 100,
11      "DirectOffspring": 4,
12      "Distribution": "100n",
13      "GroupPartner": [],
14      "PhenotypicFlexibility": 0.0,
15
16      "AssociatedSpecies": [],
17      "IndirectOffspring": 0,
18      "FitnessVariationLimit": 0
19    }
20  ]
21 }
22
```

Rank: From 100 to 1000

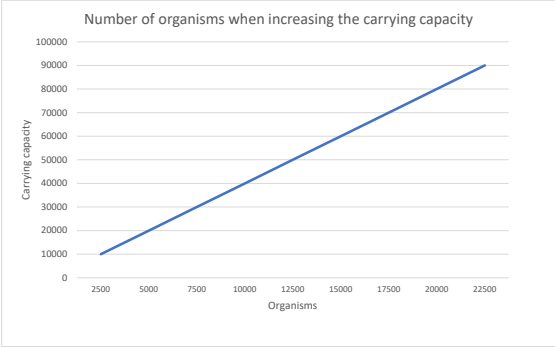

Predation

Functional and numerical responses with different distributions

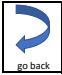

1

|                          |                     |
|--------------------------|---------------------|
| Training dataset         | [46]                |
| Initial State Name       | 1Pred.json          |
| Terminal Command or Rank | ae4.py Paper1/1Pred |
| Simulation data          | [46]                |

```
1 {
2   "NumberOfCells": 100,
3   "NumberOfRsrcsInEachCell": 100,
4   "Distribution": "100n",
5   "Species": [
6     {
7       "id": "N.sertifer",
8       "NumberOfOffs": 100,
9       "DirectOffspring": 2,
10      "GroupPartners": [],
11      "PhenotypicFlexibility": 0.0,
12      "AssociatedSpecies": [],
13      "IndirectOffspring": 0,
14      "FitnessVariationLimit": 0
15    }
16  ]
17 }
18 }
```

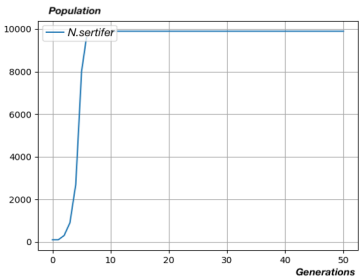

2

|                                                              |
|--------------------------------------------------------------|
| With 100 of resources for each cell and DirectOffspring = 3  |
| Terminal Command or Rank: ae4.py Paper1/1Pred --numGen=50 -p |

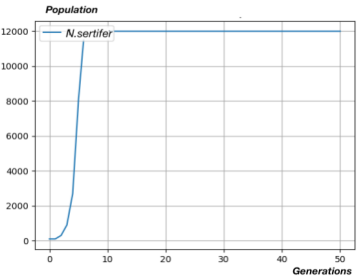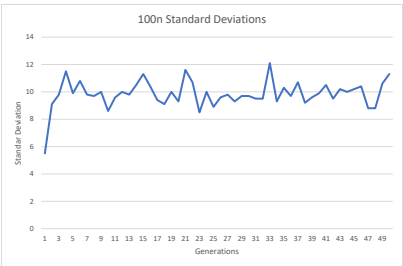

3

|                                                                                            |
|--------------------------------------------------------------------------------------------|
| With 120 of resources for each cell and Direct = 3 NUMERICAL RESPONSE                      |
| Terminal Command or Rank: ae4.py Paper1/1Pred --numGen=50 -p --NumberOfRsrcsInEachCell=120 |

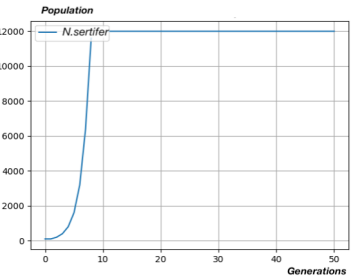

4

|                                                                                                                            |
|----------------------------------------------------------------------------------------------------------------------------|
| With 120 of resources for each cell and Direct = 2 NUMERICAL RESPONSE AND UNIFORM DISTRIBUTION                             |
| Terminal Command or Rank: ae4.py Paper1/1Pred --numGen=50 -p --NumberOfRsrcsInEachCell=120 --species="0,DirectOffspring=2" |

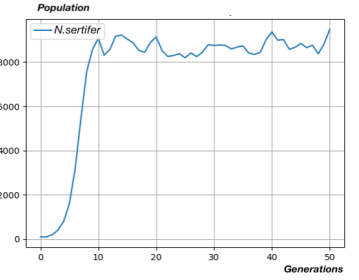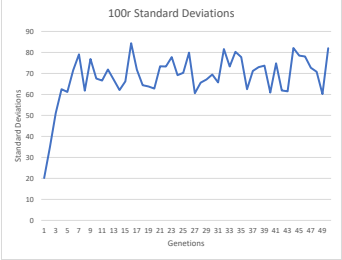

|                                                                                                                                                |
|------------------------------------------------------------------------------------------------------------------------------------------------|
| With 120 of resources for each cell and Direct = 3 AGGREGATED DISTRIBUTION                                                                     |
| Terminal Command or Rank: ae4.py Paper1/1Pred --numGen=50 -p --NumberOfRsrcsInEachCell=120 --species="0,DirectOffspring=2" --Distribution=100r |

Parasitism

Brood parasites

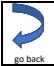

|                           |                     |
|---------------------------|---------------------|
| Training dataset:         | 147.48              |
| Initial State Name:       | 1Para.json          |
| Terminal Command or Rank: | ae4.py Paper1/1Para |
| Simulation data:          |                     |

1

```
1 {
2   "NumberOfCells": 1000,
3   "NumberOfRscInEachCell": 100,
4   "Distribution": "100n",
5   "species": [
6     {
7       "id": "Cucko",
8       "NumberOfItems": 50,
9       "DirectOffspring": 0,
10      "Distribution": "100n",
11      "GroupPartners": [],
12      "PhenotypicFlexibility": 0.0,
13      "AssociatedSpecies": ["Carricero"],
14      "IndirectOffspring": -2,
15      "FitnessVariationLimit": 0
16    },
17    {
18      "id": "Carricero",
19      "NumberOfItems": 100,
20      "DirectOffspring": 2,
21      "Distribution": "100n",
22      "GroupPartners": [],
23      "PhenotypicFlexibility": 0.0,
24      "AssociatedSpecies": ["Cucko"],
25      "IndirectOffspring": 2,
26      "FitnessVariationLimit": 0
27    }
28  ]
29 }
30 }
```

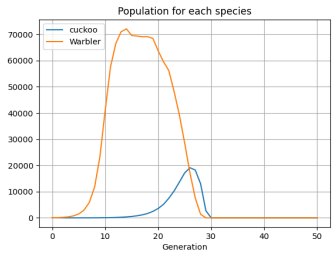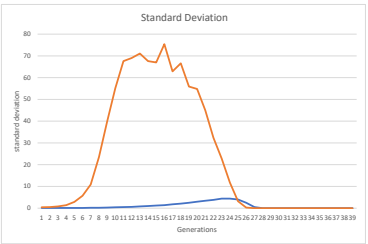

The cuckoo disperses more evenly distributed than the reed warbler (100n vs 100r) extinguishes it and the cuckoo extinguishes

Terminal Command or Rank: ae4.py Paper1/1Para -p --numGen=50 --setRandomSeed=0

2

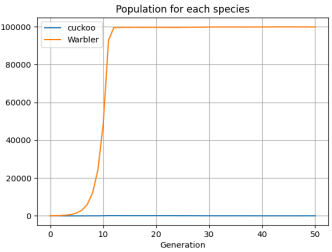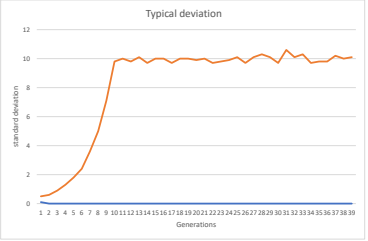

The cuckoo disperses less evenly distributed than the reed warbler (100r vs 100n) there is stable equilibrium

Terminal Command or Rank: ae4.py Paper1/1Para -p --numGen=50 --species="0.Distribution=100r;1.Distribution=100n"

3

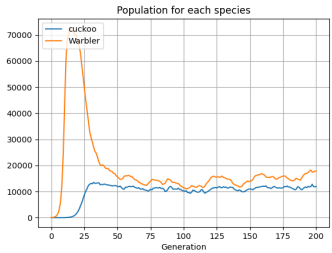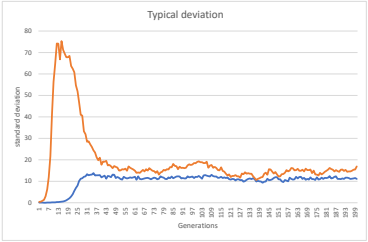

Both populations disperse equally, forming groups (100r). There is equilibrium

Terminal Command or Rank: ae4.py Paper1/1Para -p --numGen=200 --species="0.Distribution=100r;1.Distribution=100n" --setRandomSeed=2

4

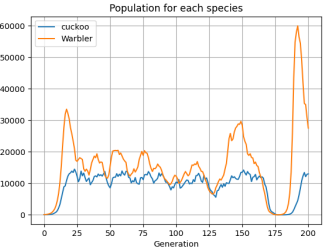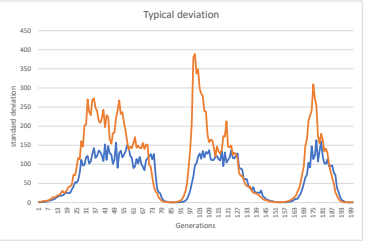

More fragmented habitat (from 1000 to 100 cells): there are cycles of near extinction of both populations

Terminal Command or Rank: ae4.py Paper1/1Para -p --numGen=200 --species="0.Distribution=100r;1.Distribution=100n" --setRandomSeed=2 --NumberOfCells=100 --NumberOfRscInEachCell=1000

5

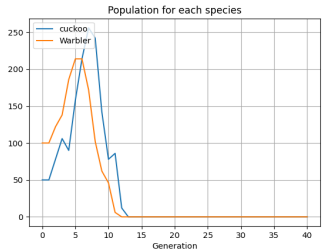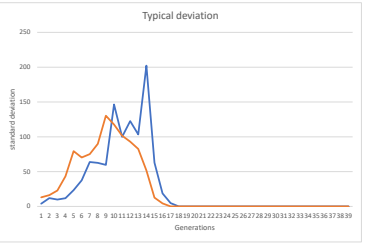

Even more fragmented habitat (1000 to 10 cells): both populations are rapidly becoming extinct

Terminal Command or Rank: ae4.py Paper1/1Para -p --numGen=40 --species="0.Distribution=100r;1.Distribution=100n" --setRandomSeed=2 --NumberOfCells=10 --NumberOfRscInEachCell=10000

Amensalism

Simple

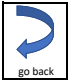

|                          |                     |
|--------------------------|---------------------|
| Training dataset         |                     |
| Initial State Name       | 1Amen.json          |
| Terminal Command or Rank | ae4.py Paper1/1Amen |
| Simulation data          |                     |

```
1Amen.json — AE-4
1 {
2   "NumberOfCells": 100,
3   "NumberOfRsrcsInEachCell": 100,
4   "Distribution": "100n",
5   "species": [
6     {
7       "id": "Eucalyptus",
8       "NumberOfItems": 100,
9       "DirectOffspring": 5,
10      "Distribution": "100n",
11      "GroupPartners": [],
12      "PhenotypicFlexibility": 0.0,
13      "AssociatedSpecies": ["Other"],
14      "IndirectOffspring": -2,
15      "FitnessVariationLimit": 0
16    },
17    {
18      "id": "Other",
19      "NumberOfItems": 100,
20      "DirectOffspring": 5,
21      "Distribution": "100n",
22      "GroupPartners": [],
23      "PhenotypicFlexibility": 0.0,
24      "AssociatedSpecies": [],
25      "IndirectOffspring": 0,
26      "FitnessVariationLimit": 0
27    }
28  ]
29 }
30 }
31 }
32 }
```

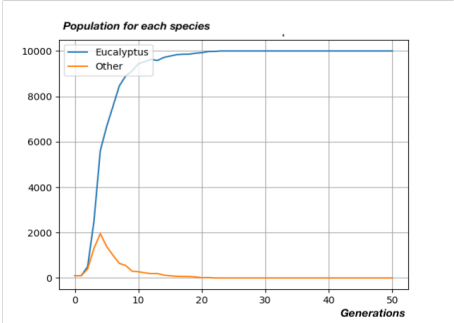

|                             |                                    |
|-----------------------------|------------------------------------|
| Eucalyptus and other plants |                                    |
| Terminal Command or Rank:   | ae4.py Paper1/1Amen --numGen=50 -p |

Amensalism

With grouping

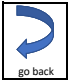

|                          |                      |
|--------------------------|----------------------|
| Training dataset         | 69                   |
| Initial State Name       | 1Amen2.json          |
| Terminal Command or Rank | ae4.py Paper1/1Amen2 |
| Simulation data          |                      |

```
1 {
2   "NumberOfCells": 10,
3   "NumberOfRsrcsInEachCell": 1000,
4   "Distribution": "100n",
5   "species": [
6     {
7       "id": "Killer",
8       "NumberOfItems": 100,
9       "DirectOffspring": 3,
10      "Distribution": "100n",
11      "GroupPartners": ["Sensitive"],
12      "PhenotypicFlexibility": 0.10,
13
14      "AssociatedSpecies": [],
15      "IndirectOffspring": 0,
16      "FitnessVariationLimit": 0
17    },
18    {
19      "id": "Sensitive",
20      "NumberOfItems": 100,
21      "DirectOffspring": 3,
22      "Distribution": "100n",
23      "GroupPartners": [],
24      "PhenotypicFlexibility": 0.0,
25
26      "AssociatedSpecies": [],
27      "IndirectOffspring": 0,
28      "FitnessVariationLimit": 0
29    },
30    {
31      "id": "Killer|Sensitive",
32      "NumberOfItems": 0,
33      "DirectOffspring": 3,
34      "Distribution": "100n",
35      "GroupPartners": [],
36      "PhenotypicFlexibility": 0.0,
37
38      "AssociatedSpecies": ["Sensitive"],
39      "IndirectOffspring": -2,
40      "FitnessVariationLimit": 0
41    }
42  ]
43 }
```

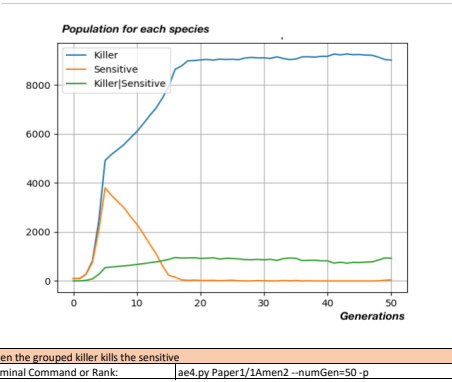

Competitive exclusion principle

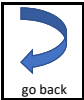

|                          |                                               |
|--------------------------|-----------------------------------------------|
| Training dataset         | [47]                                          |
| Initial State Name       | 1Exclu.json                                   |
| Terminal Command or Rank | ae4.py Paper1/1Exclu --numGen=50 --verbose -p |
| Simulation data          |                                               |

```
1 {
2   "NumberOfCells": 10,
3   "NumberOfRsrcsInEachCell": 100,
4   "Distribution": "100n",
5   "species": [
6     {
7       "id": "P.aurelia",
8       "NumberOfItems": 100,
9       "DirectOffspring": 7,
10      "Distribution": "100n",
11      "GroupPartners": [],
12      "PhenotypicFlexibility": 0.0,
13
14      "AssociatedSpecies": [],
15      "IndirectOffspring": 0,
16      "FitnessVariationLimit": 0
17    },
18    {
19      "id": "P.caudatum",
20      "NumberOfItems": 100,
21      "DirectOffspring": 4,
22      "Distribution": "100n",
23      "GroupPartners": [],
24      "PhenotypicFlexibility": 0.0,
25
26      "AssociatedSpecies": [],
27      "IndirectOffspring": 0,
28      "FitnessVariationLimit": 0
29    }
30  ]
31 }
32
```

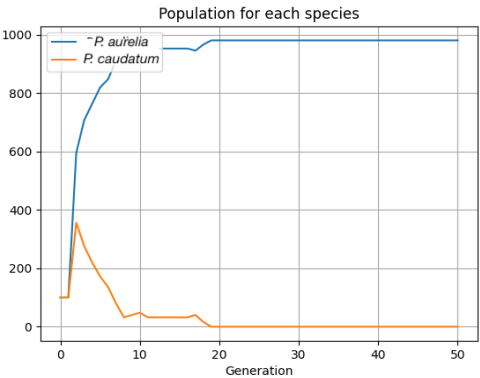

Intraspecific competition

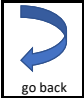

|                          |                         |
|--------------------------|-------------------------|
| Training dataset         |                         |
| Initial State Name       | 1Intra.json             |
| Terminal Command or Rank | ae4.py Paper1/1Intra -p |
| Simulation data          |                         |

```
1 {
2   "NumberOfCells": 100,
3   "NumberOfRsrcsInEachCell": 100,
4   "Distribution": "100n",
5   "species": [
6     {
7       "id": "sp",
8       "NumberOfItems": 100,
9       "DirectOffspring": 4,
10      "Distribution": "100n",
11      "GroupPartners": [],
12      "PhenotypicFlexibility": 0.0,
13
14      "AssociatedSpecies": [],
15      "IndirectOffspring": 0,
16      "FitnessVariationLimit": 0
17    }
18  ]
19 }
20
```

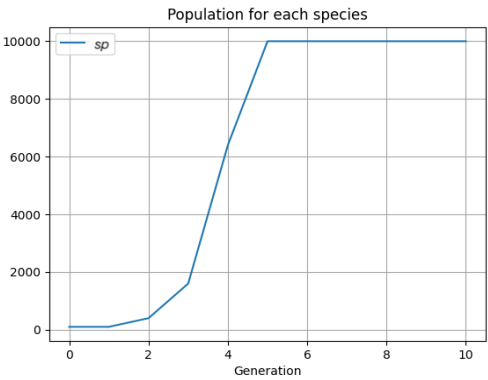



Neutralism



|                          |                                    |
|--------------------------|------------------------------------|
| Training dataset         | [50]                               |
| Initial State Name       | 1Neu.json                          |
| Terminal Command or Rank | ae4.py Paper1/1Neu -p --numGen=100 |
| Simulation data          |                                    |

```
1 {
2   "NumberOfCells": 100,
3   "NumberOfRsrcsInEachCell": 100,
4   "Distribution": "100n",
5   "species": [
6     {
7       "id": "SP1",
8       "NumberOfItems": 100,
9       "DirectOffspring": 2,
10      "Distribution": "100n",
11      "GroupPartners": [],
12      "PhenotypicFlexibility": 0.0,
13
14      "AssociatedSpecies": ["SP2"],
15      "IndirectOffspring": 0,
16      "FitnessVariationLimit": 0
17    },
18    {
19      "id": "SP2",
20      "NumberOfItems": 100,
21      "DirectOffspring": 2,
22      "Distribution": "100n",
23      "GroupPartners": [],
24      "PhenotypicFlexibility": 0.0,
25
26      "AssociatedSpecies": ["SP1"],
27      "IndirectOffspring": 0,
28      "FitnessVariationLimit": 0
29    }
30  ]
31 }
32
```

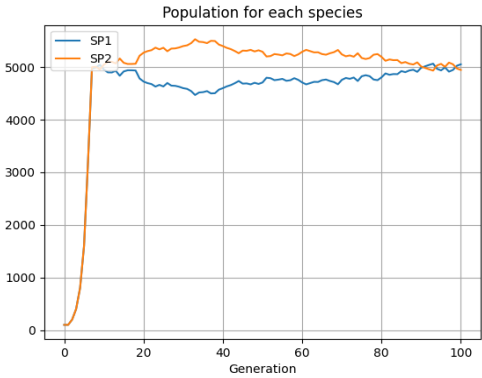

Commensalism

Sharksucker

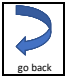

|                          |                     |
|--------------------------|---------------------|
| Training dataset         | [51]                |
| Initial State Name       | 1Comm.json          |
| Terminal Command or Rank | ae4.py Paper1/1Comm |
| Simulation data          | [51]                |

```
1 {
2   "NumberOfCells": 100,
3   "NumberOfRsrcsInEachCell": 10000,
4   "Distribution": "100n",
5   "species": [
6     {
7       "id": "Sharksucker",
8       "NumberOfItems": 100,
9       "DirectOffspring": 3,
10      "GroupPartners": ["Shark"],
11      "PhenotypicFlexibility": 0.9,
12      "AssociatedSpecies": [],
13      "IndirectOffspring": 0,
14      "FitnessVariationLimit": 0
15    },
16    {
17      "id": "Shark",
18      "NumberOfItems": 100,
19      "DirectOffspring": 70,
20      "GroupPartners": [],
21      "PhenotypicFlexibility": 0.0,
22      "AssociatedSpecies": [],
23      "IndirectOffspring": 0,
24      "FitnessVariationLimit": 0
25    },
26    {
27      "id": "Sharksucker|Shark",
28      "NumberOfItems": 0,
29      "DirectOffspring": 70,
30      "GroupPartners": [],
31      "PhenotypicFlexibility": 0.0,
32      "AssociatedSpecies": [],
33      "IndirectOffspring": 0,
34      "FitnessVariationLimit": 0
35    }
36  ]
37 }
```

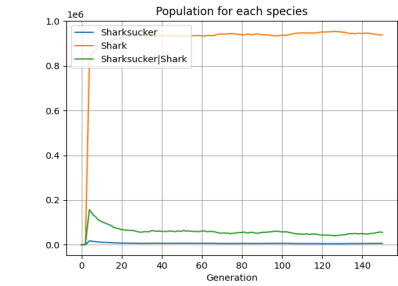

|                           |                                    |
|---------------------------|------------------------------------|
| Uniform distribution 100n |                                    |
| Terminal Command or Rank: | ae4.py Paper1/1Comm -numGen=150 -p |

## Theories on Eusociality

## Multilevel selection vs kin selection

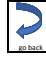

|                          |                   |
|--------------------------|-------------------|
| Training dataset         | 178               |
| Initial State Name       | 1002.json         |
| Terminal Command or Rank | ls4.py Paper1/Eu2 |
| Simulation data          |                   |

1

```

1  "NumberOffCells": 100,
2  "NumberOffCells": 1000,
3  "Distribution": "1000",
4  "species": [
5    {
6      "id": "Solitary bees",
7      "NumberOffCells": 100,
8      "DirectOffspring": 1,
9      "GroupPartner": 1,
10     "PhenotypicFlexibility": 0.0,
11   },
12   {
13     "id": "Eusocial Wt",
14     "NumberOffCells": 100,
15     "DirectOffspring": 1,
16     "GroupPartner": 1,
17     "PhenotypicFlexibility": 0.0,
18   },
19   {
20     "id": "Eusocial Wt(Eusocial Wt)",
21     "NumberOffCells": 100,
22     "DirectOffspring": 1,
23     "GroupPartner": 1,
24     "PhenotypicFlexibility": 0.0,
25   },
26   {
27     "id": "Eusocial Wt(Eusocial Wt(Eusocial Wt))",
28     "NumberOffCells": 100,
29     "DirectOffspring": 1,
30     "GroupPartner": 1,
31     "PhenotypicFlexibility": 0.0,
32   },
33   {
34     "id": "Eusocial Wt(Eusocial Wt(Eusocial Wt(Eusocial Wt)))",
35     "NumberOffCells": 100,
36     "DirectOffspring": 1,
37     "GroupPartner": 1,
38     "PhenotypicFlexibility": 0.0,
39   },
40   {
41     "id": "Eusocial Wt(Eusocial Wt(Eusocial Wt(Eusocial Wt(Eusocial Wt)))",
42     "NumberOffCells": 100,
43     "DirectOffspring": 1,
44     "GroupPartner": 1,
45     "PhenotypicFlexibility": 0.0,
46   },
47   {
48     "id": "Eusocial Wt(Eusocial Wt(Eusocial Wt(Eusocial Wt(Eusocial Wt(Eusocial Wt)))",
49     "NumberOffCells": 100,
50     "DirectOffspring": 1,
51     "GroupPartner": 1,
52     "PhenotypicFlexibility": 0.0,
53   },
54   {
55     "id": "Eusocial Wt(Eusocial Wt(Eusocial Wt(Eusocial Wt(Eusocial Wt(Eusocial Wt(Eusocial Wt)))",
56     "NumberOffCells": 100,
57     "DirectOffspring": 1,
58     "GroupPartner": 1,
59     "PhenotypicFlexibility": 0.0,
60   },
61   {
62     "id": "Eusocial Wt(Eusocial Wt(Eusocial Wt(Eusocial Wt(Eusocial Wt(Eusocial Wt(Eusocial Wt(Eusocial Wt)))",
63     "NumberOffCells": 100,
64     "DirectOffspring": 1,
65     "GroupPartner": 1,
66     "PhenotypicFlexibility": 0.0,
67   },
68   {
69     "id": "Eusocial Wt(Eusocial Wt(Eusocial Wt(Eusocial Wt(Eusocial Wt(Eusocial Wt(Eusocial Wt(Eusocial Wt(Eusocial Wt)))",
70     "NumberOffCells": 100,
71     "DirectOffspring": 1,
72     "GroupPartner": 1,
73     "PhenotypicFlexibility": 0.0,
74   },
75   {
76     "id": "Eusocial Wt(Eusocial Wt(Eusocial Wt(Eusocial Wt(Eusocial Wt(Eusocial Wt(Eusocial Wt(Eusocial Wt(Eusocial Wt(Eusocial Wt)))",
77     "NumberOffCells": 100,
78     "DirectOffspring": 1,
79     "GroupPartner": 1,
80     "PhenotypicFlexibility": 0.0,
81   },
82   {
83     "id": "Eusocial Wt(Eusocial Wt)))",
84     "NumberOffCells": 100,
85     "DirectOffspring": 1,
86     "GroupPartner": 1,
87     "PhenotypicFlexibility": 0.0,
88   },
89   {
90     "id": "Eusocial Wt(Eusocial Wt)))",
91     "NumberOffCells": 100,
92     "DirectOffspring": 1,
93     "GroupPartner": 1,
94     "PhenotypicFlexibility": 0.0,
95   },
96   {
97     "id": "Eusocial Wt(Eusocial Wt)))",
98     "NumberOffCells": 100,
99     "DirectOffspring": 1,
100    "GroupPartner": 1,
101    "PhenotypicFlexibility": 0.0,
102  },
103  ],
104  "FitnessVariationLimit": 0
105 }

```

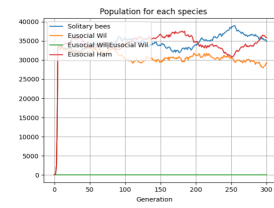

Without eusociality there is balance

Terminal Command or Rank: ls4.py Paper1/Eu2 -numGen=1000 -p

2

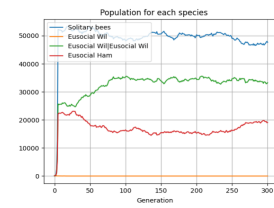

Without advantages in eusociality, there is balance

Terminal Command or Rank: ls4.py Paper1/Eu2 -numGen=1000 -p -species="1,PhenotypicFlexibility=1.2,PhenotypicFlexibility=1.3,DirectOffspring=0,IndirectOffspring=0"

3

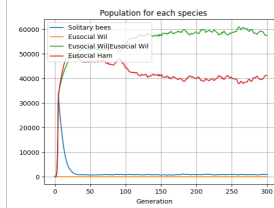

Both species of eusocial bees prevail for the same

Terminal Command or Rank: ls4.py Paper1/Eu2 -numGen=1000 -p -species="1,PhenotypicFlexibility=1.2,DirectOffspring=6.3,DirectOffspring=0,IndirectOffspring=0"

4

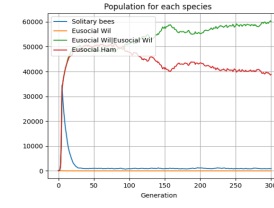

Both species of eusocial bees prevail for the same

Terminal Command or Rank: ls4.py Paper1/Eu2 -numGen=1000 -p -species="1,PhenotypicFlexibility=1.2,DirectOffspring=6,PhenotypicFlexibility=1.4,DirectOffspring=0,IndirectOffspring=0"

5

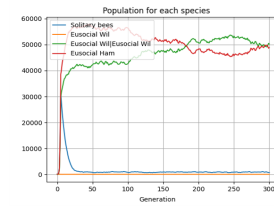

Both species of eusocial bees prevail for the same

Terminal Command or Rank: ls4.py Paper1/Eu2 -numGen=1000 -p -species="1,PhenotypicFlexibility=1.2,DirectOffspring=6.5,DirectOffspring=1,IndirectOffspring=0"

6

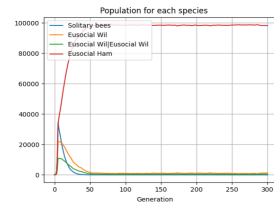

The bee species that follows the kin selection prevails

Terminal Command or Rank: ls4.py Paper1/Eu2 -numGen=1000 -p -species="1,PhenotypicFlexibility=0.5,DirectOffspring=6.3,DirectOffspring=0,IndirectOffspring=0"

7

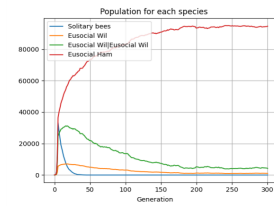

The bee species that follows the kin selection prevails

Terminal Command or Rank: ls4.py Paper1/Eu2 -numGen=1000 -p -species="1,PhenotypicFlexibility=0.9,DirectOffspring=6.3,DirectOffspring=0,IndirectOffspring=0"

### Non-collaboration vs. Association vs. Eusociality

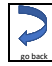

|                          |                      |
|--------------------------|----------------------|
| Training dataset         | [71,72]              |
| Initial State Name       | 1Colab.json          |
| Terminal Command or Rank | ae4.py Paper1/1Colab |
| Simulation data          |                      |

1

```

10 "numberOfCells": 100,
11 "numberOfParameters": 1000,
12 "distribution": "log",
13 "species": [
14     "S": "Military base",
15     "I": "Infected",
16     "R": "Recovered",
17     "D": "Deceased",
18     "M": "Military facility",
19     "A": "Associated species",
20     "V": "Value variation limit"
21 ],
22 "parameters": [
23     {
24         "name": "r",
25         "value": 1.0,
26         "unit": "1/days",
27         "description": "Reproduction rate"
28     },
29     {
30         "name": "beta",
31         "value": 0.001,
32         "unit": "1/(days*person)",
33         "description": "Transmission rate"
34     },
35     {
36         "name": "gamma",
37         "value": 0.1,
38         "unit": "1/days",
39         "description": "Recovery rate"
40     },
41     {
42         "name": "delta",
43         "value": 0.001,
44         "unit": "1/days",
45         "description": "Death rate"
46     },
47     {
48         "name": "mu",
49         "value": 0.001,
50         "unit": "1/days",
51         "description": "Mortality rate"
52     },
53     {
54         "name": "rho",
55         "value": 0.001,
56         "unit": "1/days",
57         "description": "Recovery rate"
58     },
59     {
60         "name": "sigma",
61         "value": 0.001,
62         "unit": "1/days",
63         "description": "Recovery rate"
64     },
65     {
66         "name": "tau",
67         "value": 0.001,
68         "unit": "1/days",
69         "description": "Recovery rate"
70     },
71     {
72         "name": "omega",
73         "value": 0.001,
74         "unit": "1/days",
75         "description": "Recovery rate"
76     },
77     {
78         "name": "phi",
79         "value": 0.001,
80         "unit": "1/days",
81         "description": "Recovery rate"
82     },
83     {
84         "name": "chi",
85         "value": 0.001,
86         "unit": "1/days",
87         "description": "Recovery rate"
88     },
89     {
90         "name": "psi",
91         "value": 0.001,
92         "unit": "1/days",
93         "description": "Recovery rate"
94     },
95     {
96         "name": "eta",
97         "value": 0.001,
98         "unit": "1/days",
99         "description": "Recovery rate"
100     },
101     {
102         "name": "theta",
103         "value": 0.001,
104         "unit": "1/days",
105         "description": "Recovery rate"
106     },
107     {
108         "name": "zeta",
109         "value": 0.001,
110         "unit": "1/days",
111         "description": "Recovery rate"
112     },
113     {
114         "name": "nu",
115         "value": 0.001,
116         "unit": "1/days",
117         "description": "Recovery rate"
118     },
119     {
120         "name": "xi",
121         "value": 0.001,
122         "unit": "1/days",
123         "description": "Recovery rate"
124     },
125     {
126         "name": "omicron",
127         "value": 0.001,
128         "unit": "1/days",
129         "description": "Recovery rate"
130     },
131     {
132         "name": "kappa",
133         "value": 0.001,
134         "unit": "1/days",
135         "description": "Recovery rate"
136     },
137     {
138         "name": "lambda",
139         "value": 0.001,
140         "unit": "1/days",
141         "description": "Recovery rate"
142     },
143     {
144         "name": "mu",
145         "value": 0.001,
146         "unit": "1/days",
147         "description": "Mortality rate"
148     },
149     {
150         "name": "rho",
151         "value": 0.001,
152         "unit": "1/days",
153         "description": "Recovery rate"
154     },
155     {
156         "name": "sigma",
157         "value": 0.001,
158         "unit": "1/days",
159         "description": "Recovery rate"
160     },
161     {
162         "name": "tau",
163         "value": 0.001,
164         "unit": "1/days",
165         "description": "Recovery rate"
166     },
167     {
168         "name": "omega",
169         "value": 0.001,
170         "unit": "1/days",
171         "description": "Recovery rate"
172     },
173     {
174         "name": "phi",
175         "value": 0.001,
176         "unit": "1/days",
177         "description": "Recovery rate"
178     },
179     {
180         "name": "chi",
181         "value": 0.001,
182         "unit": "1/days",
183         "description": "Recovery rate"
184     },
185     {
186         "name": "psi",
187         "value": 0.001,
188         "unit": "1/days",
189         "description": "Recovery rate"
190     },
191     {
192         "name": "eta",
193         "value": 0.001,
194         "unit": "1/days",
195         "description": "Recovery rate"
196     },
197     {
198         "name": "theta",
199         "value": 0.001,
200         "unit": "1/days",
201         "description": "Recovery rate"
202     },
203     {
204         "name": "zeta",
205         "value": 0.001,
206         "unit": "1/days",
207         "description": "Recovery rate"
208     },
209     {
210         "name": "nu",
211         "value": 0.001,
212         "unit": "1/days",
213         "description": "Recovery rate"
214     },
215     {
216         "name": "xi",
217         "value": 0.001,
218         "unit": "1/days",
219         "description": "Recovery rate"
220     },
221     {
222         "name": "omicron",
223         "value": 0.001,
224         "unit": "1/days",
225         "description": "Recovery rate"
226     },
227     {
228         "name": "kappa",
229         "value": 0.001,
230         "unit": "1/days",
231         "description": "Recovery rate"
232     },
233     {
234         "name": "lambda",
235         "value": 0.001,
236         "unit": "1/days",
237         "description": "Recovery rate"
238     },
239     {
240         "name": "mu",
241         "value": 0.001,
242         "unit": "1/days",
243         "description": "Mortality rate"
244     },
245     {
246         "name": "rho",
247         "value": 0.001,
248         "unit": "1/days",
249         "description": "Recovery rate"
250     },
251     {
252         "name": "sigma",
253         "value": 0.001,
254         "unit": "1/days",
255         "description": "Recovery rate"
256     },
257     {
258         "name": "tau",
259         "value": 0.001,
260         "unit": "1/days",
261         "description": "Recovery rate"
262     },
263     {
264         "name": "omega",
265         "value": 0.001,
266         "unit": "1/days",
267         "description": "Recovery rate"
268     },
269     {
270         "name": "phi",
271         "value": 0.001,
272         "unit": "1/days",
273         "description": "Recovery rate"
274     },
275     {
276         "name": "chi",
277         "value": 0.001,
278         "unit": "1/days",
279         "description": "Recovery rate"
280     },
281     {
282         "name": "psi",
283         "value": 0.001,
284         "unit": "1/days",
285         "description": "Recovery rate"
286     },
287     {
288         "name": "eta",
289         "value": 0.001,
290         "unit": "1/days",
291         "description": "Recovery rate"
292     },
293     {
294         "name": "theta",
295         "value": 0.001,
296         "unit": "1/days",
297         "description": "Recovery rate"
298     },
299     {
300         "name": "zeta",
301         "value": 0.001,
302         "unit": "1/days",
303         "description": "Recovery rate"
304     },
305     {
306         "name": "nu",
307         "value": 0.001,
308         "unit": "1/days",
309         "description": "Recovery rate"
310     },
311     {
312         "name": "xi",
313         "value": 0.001,
314         "unit": "1/days",
315         "description": "Recovery rate"
316     },
317     {
318         "name": "omicron",
319         "value": 0.001,
320         "unit": "1/days",
321         "description": "Recovery rate"
322     },
323     {
324         "name": "kappa",
325         "value": 0.001,
326         "unit": "1/days",
327         "description": "Recovery rate"
328     },
329     {
330         "name": "lambda",
331         "value": 0.001,
332         "unit": "1/days",
333         "description": "Recovery rate"
334     },
335     {
336         "name": "mu",
337         "value": 0.001,
338         "unit": "1/days",
339         "description": "Mortality rate"
340     },
341     {
342         "name": "rho",
343         "value": 0.001,
344         "unit": "1/days",
345         "description": "Recovery rate"
346     },
347     {
348         "name": "sigma",
349         "value": 0.001,
350         "unit": "1/days",
351         "description": "Recovery rate"
352     },
353     {
354         "name": "tau",
355         "value": 0.001,
356         "unit": "1/days",
357         "description": "Recovery rate"
358     },
359     {
360         "name": "omega",
361         "value": 0.001,
362         "unit": "1/days",
363         "description": "Recovery rate"
364     },
365     {
366         "name": "phi",
367         "value": 0.001,
368         "unit": "1/days",
369         "description": "Recovery rate"
370     },
371     {
372         "name": "chi",
373         "value": 0.001,
374         "unit": "1/days",
375         "description": "Recovery rate"
376     },
377     {
378         "name": "psi",
379         "value": 0.001,
380         "unit": "1/days",
381         "description": "Recovery rate"
382     },
383     {
384         "name": "eta",
385         "value": 0.001,
386         "unit": "1/days",
387         "description": "Recovery rate"
388     },
389     {
390         "name": "theta",
391         "value": 0.001,
392         "unit": "1/days",
393         "description": "Recovery rate"
394     },
395     {
396         "name": "zeta",
397         "value": 0.001,
398         "unit": "1/days",
399         "description": "Recovery rate"
400     },
40
```

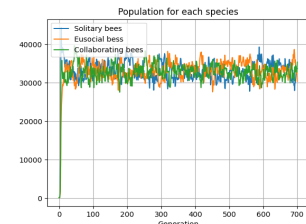

Aggregated distribution, fragmented habitat

|                           |                                                          |
|---------------------------|----------------------------------------------------------|
| Terminal Command or Rank: | ae4.py Paper1/1Colab -p --numGen=700 --Distribution=100r |
|---------------------------|----------------------------------------------------------|

2

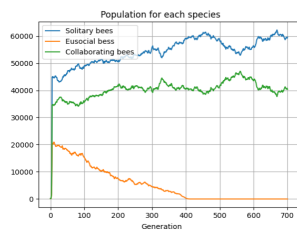

|                                          |             |
|------------------------------------------|-------------|
| Uniform distribution, fragmented habitat |             |
| Commander Bank                           | CoA m. Bank |

|                           |                                                          |
|---------------------------|----------------------------------------------------------|
| Terminal Command or Rank: | ae4.py Paper1/1Colab -p --numGen=700 --Distribution=100m |
|---------------------------|----------------------------------------------------------|

3

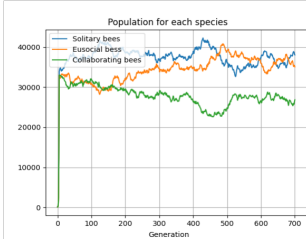

|                                                 |            |
|-------------------------------------------------|------------|
| Uniform distribution, habitat little fragmented |            |
| Common on Banks                                 | Infrequent |

|                           |                                                                                                            |
|---------------------------|------------------------------------------------------------------------------------------------------------|
| Terminal Command or Rank: | ae4.py Paper1/1Colab -p --numGen=700 --Distribution=100n --NumberOfCells=5 --NumberOfRsrcsInEachCell=20000 |
|---------------------------|------------------------------------------------------------------------------------------------------------|

4

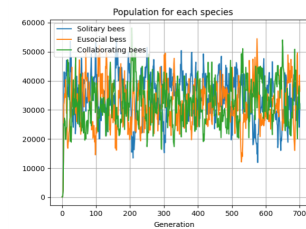

Aggregated distribution, little fragmented habitat

|                           |                                                                                                            |
|---------------------------|------------------------------------------------------------------------------------------------------------|
| Terminal Command or Rank: | ae4.py Paper1/1Colab -p --numGen=700 --Distribution=100r --NumberOfCells=5 --NumberOfRsrcsInEachCell=20000 |
|---------------------------|------------------------------------------------------------------------------------------------------------|

5

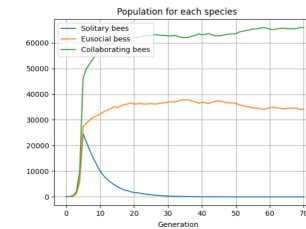

Solitary less efficient, more uniform distribution

|                           |                                                                                         |
|---------------------------|-----------------------------------------------------------------------------------------|
| Terminal Command or Rank: | ae4.py Paper1/1Colab -p --numGen=70 --Distribution=100n --species="0;DirectOffspring=4" |
|---------------------------|-----------------------------------------------------------------------------------------|

6

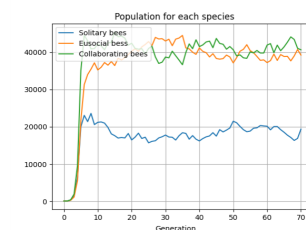

Solitary less efficient, less uniform distribution

|                           |                                                                                         |
|---------------------------|-----------------------------------------------------------------------------------------|
| Terminal Command or Rank: | ae4.py Paper1/1Colab -p --numGen=70 --Distribution=100r --species="0;DirectOffspring=4" |
|---------------------------|-----------------------------------------------------------------------------------------|

Interspecific social collaboration

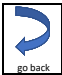

|                          |                     |
|--------------------------|---------------------|
| Training dataset         | [17]                |
| Initial State Name       | 15ymb.json          |
| Terminal Command or Rank | ae4.py Paper1/15ymb |
| Simulation data          | [17]                |

1

```
1 "NumberofCells": 100,  
2 "NumberofParasitoidCells": 1000,  
3 "Distribution": "100%",  
4 "Species": 1,  
5 {  
6   "id": "Environmental bacteria",  
7   "NumberofFitness": 100,  
8   "DirectOffspring": 2,  
9   "GroupPartners": 1,  
10  "PhenotypicFlexibility": 0.0,  
11  "AssociatedSpecies": ["Stinkbug"],  
12  "IndirectOffspring": 3,  
13  "FitnessVariationLimit": 0  
14 },  
15 {  
16   "id": "Stinkbug",  
17   "NumberofFitness": 100,  
18   "DirectOffspring": 0,  
19   "GroupPartners": ["Environmental bacteria"],  
20   "PhenotypicFlexibility": 0.5,  
21  "AssociatedSpecies": 1,  
22  "IndirectOffspring": 0,  
23  "FitnessVariationLimit": 0  
24 },  
25 {  
26   "id": "Stinkbug/Environmental bacteria",  
27   "NumberofFitness": 100,  
28   "DirectOffspring": 3,  
29   "GroupPartners": 1,  
30   "PhenotypicFlexibility": 0.0,  
31  "AssociatedSpecies": 1,  
32  "IndirectOffspring": 0,  
33  "FitnessVariationLimit": 0  
34 }  
35 }
```

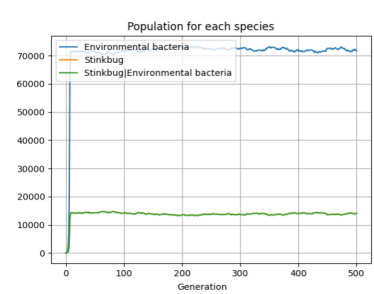

There is no symbiosis: PhenotypicFlexibility of the group = 0. Bedbug PhenotypicFlexibility = 0.5  
Terminal Command or Rank: ae4.py Paper1/15ymb -p --numGen=500

2

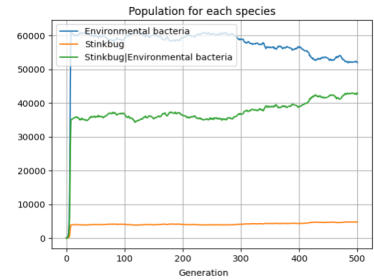

There is no symbiosis: PhenotypicFlexibility of the group = 0. Bedbug PhenotypicFlexibility = 0.9  
Terminal Command or Rank: ae4.py Paper1/15ymb -p --numGen=500 --species="1;PhenotypicFlexibility=0.9"

3

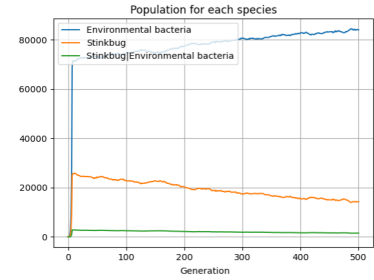

There is no symbiosis: PhenotypicFlexibility of the group = 0. Bedbug PhenotypicFlexibility = 0.1  
Terminal Command or Rank: ae4.py Paper1/15ymb -p --numGen=500 --species="1;PhenotypicFlexibility=0.1"

4

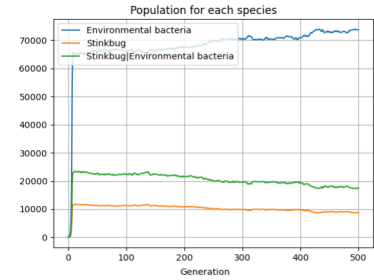

Symbiosis at 50%: PhenotypicFlexibility of the group = 0.5. Bedbug PhenotypicFlexibility = 0.5  
Terminal Command or Rank: ae4.py Paper1/15ymb -p --numGen=500 --species="2;PhenotypicFlexibility=0.5"

5

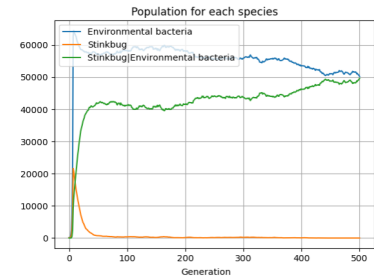

Symbiosis only: PhenotypicFlexibility of the group = 1. Bedbug PhenotypicFlexibility = 0.1  
Terminal Command or Rank: ae4.py Paper1/15ymb -p --numGen=500 --species="1;PhenotypicFlexibility=0.1;2;PhenotypicFlexibility=1"

Random Genetic drift

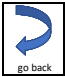

|                          |                     |
|--------------------------|---------------------|
| Training dataset         | [77,78]             |
| Initial State Name       | 1Deri.json          |
| Terminal Command or Rank | ae4.py Paper1/1Deri |
| Simulation data          | 77,78               |

1

```
1 {
2   "NumberOfCells": 1000,
3   "NumberOfRsrcsInEachCell": 4,
4   "Distribution": "100n",
5   "species": [
6     {
7       "id": "A",
8       "NumberOfItems": 100,
9       "DirectOffspring": 2,
10      "Distribution": "100n",
11      "GroupPartners": [],
12      "PhenotypicFlexibility": 0.0,
13
14      "AssociatedSpecies": [],
15      "IndirectOffspring": 0,
16      "FitnessVariationLimit": 0
17    },
18    {
19      "id": "B",
20      "NumberOfItems": 100,
21      "DirectOffspring": 2,
22      "Distribution": "100n",
23      "GroupPartners": [],
24      "PhenotypicFlexibility": 0.0,
25
26      "AssociatedSpecies": [],
27      "IndirectOffspring": 0,
28      "FitnessVariationLimit": 0
29    }
30  ]
31 }
32 }
```

2

For 1000 genes. For a large enough population (heterozygous)  
Terminal Command or Rank: ae4.py Paper1/1Deri -numGen=600 -p

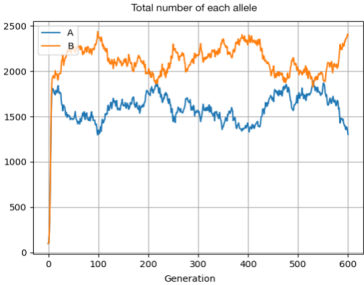

For 100 genes. For a small population (tends to be homozygous)  
Terminal Command or Rank: ae4.py Paper1/1Deri -numGen=600 -p -NumberOfCells=100

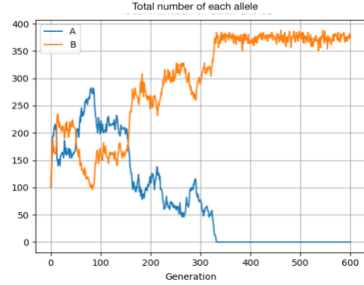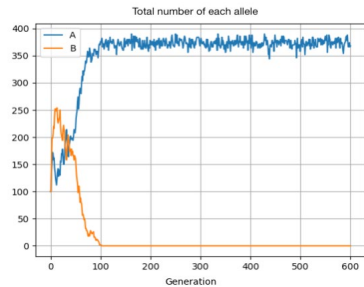

Ecological drift

In species

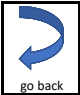

|                          |                       |
|--------------------------|-----------------------|
| Training dataset         | [79]                  |
| Initial State Name       | 1DeriSP.json          |
| Terminal Command or Rank | ae4.py Paper1/1DeriSP |
| Simulation data          |                       |

```
1DeriSP.json
1 {
2   "NumberOfCells": 100,
3   "NumberOfRsrcsInEachCell": 20,
4   "Distribution": "100n",
5   "species": [
6     {
7       "id": "sp A",
8       "NumberOfItems": 100,
9       "DirectOffspring": 3,
10      "Distribution": "100n",
11      "GroupPartners": [],
12      "PhenotypicFlexibility": 0.0,
13
14      "AssociatedSpecies": [],
15      "IndirectOffspring": 0,
16      "FitnessVariationLimit": 0
17    },
18    {
19      "id": "sp B",
20      "NumberOfItems": 100,
21      "DirectOffspring": 3,
22      "Distribution": "100n",
23      "GroupPartners": [],
24      "PhenotypicFlexibility": 0.0,
25
26      "AssociatedSpecies": [],
27      "IndirectOffspring": 0,
28      "FitnessVariationLimit": 0
29    }
30  ]
31 }
32 }
```

|                                                                 |
|-----------------------------------------------------------------|
| For 1800 organisms EEF                                          |
| Terminal Command or Rank: ae4.py Paper1/1DeriSP --numGen=600 -p |

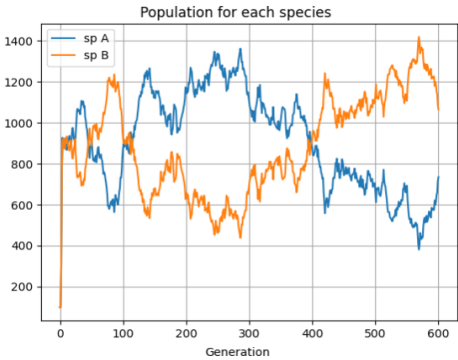

|                                                                 |
|-----------------------------------------------------------------|
| For 1800 organisms >SP BLUE                                     |
| Terminal Command or Rank: ae4.py Paper1/1DeriSP --numGen=600 -p |

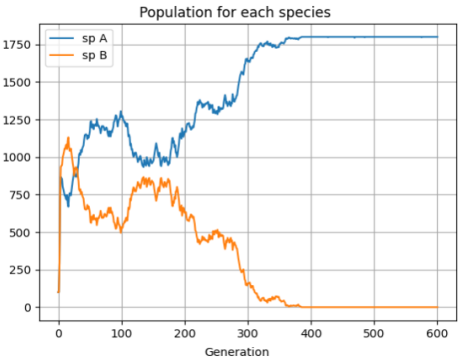

|                                                                 |
|-----------------------------------------------------------------|
| For 1800 organisms >SP ORANGE                                   |
| Terminal Command or Rank: ae4.py Paper1/1DeriSP --numGen=600 -p |

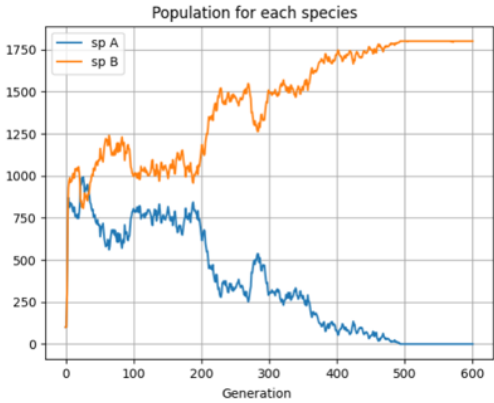

Hardy-Weinberg principle



|                          |                                                                                                               |
|--------------------------|---------------------------------------------------------------------------------------------------------------|
| Training dataset         | [70]                                                                                                          |
| Initial State Name       | 1Hardy.json                                                                                                   |
| Terminal Command or Rank | rae4.py --outDir=Paper1/1HARDY Paper1/1Hardy --numGen=30 --NumberOfSrcsInEachCell={1000000:10000000:10000000} |
| Simulation data          |                                                                                                               |

```
1 {
2   "NumberOfCells": 1,
3   "NumberOfSrcsInEachCell": 1000000,
4   "Distribution": "100n",
5   "species": [
6     {
7       "id": "A",
8       "NumberOfItems": 100,
9       "DirectOffspring": 2,
10      "Distribution": "100n",
11      "GroupPartners": [],
12      "PhenotypicFlexibility": 0.0,
13
14      "AssociatedSpecies": [],
15      "IndirectOffspring": 0,
16      "FitnessVariationLimit": 0
17    },
18    {
19      "id": "a",
20      "NumberOfItems": 100,
21      "DirectOffspring": 2,
22      "Distribution": "100n",
23      "GroupPartners": [],
24      "PhenotypicFlexibility": 0.0,
25
26      "AssociatedSpecies": [],
27      "IndirectOffspring": 0,
28      "FitnessVariationLimit": 0
29    },
30    {
31      "id": "B",
32      "NumberOfItems": 100,
33      "DirectOffspring": 2,
34      "Distribution": "100n",
35      "GroupPartners": [],
36      "PhenotypicFlexibility": 0.0,
37
38      "AssociatedSpecies": [],
39      "IndirectOffspring": 0,
40      "FitnessVariationLimit": 0
41    }
42  ]
43 }
```

Rank: from  
100000 to  
10000000

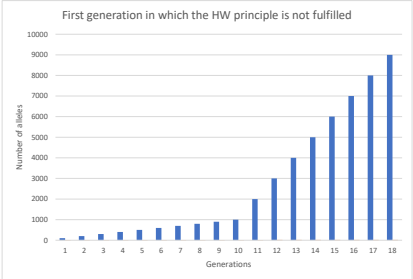

While the alleles that prevail because there are loci increase, the generation in which the HW principle is not fulfilled is delayed.

Terminal Command or Rank: rae4.py --outDir=Paper1/1HARDY Paper1/1Hardy --numGen=30 --NumberOfSrcsInEachCell={1000000:10000000:10000000}



Kin Selection

Cooperative courtship in wild turkeys

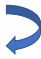

|                          |                             |
|--------------------------|-----------------------------|
| Training dataset         | 181                         |
| Initial State Name       | 1Pavo3.json and 1Pavo2.json |
| Terminal Command or Rank |                             |
| Simulation data          | 181                         |

1

```
1 {
2   "NumberOfCells": 100,
3   "NumberOfRsrcsInEachCell": 1000,
4   "Distribution": "100n",
5   "species": [
6     {
7       "id": "AlliedT",
8       "NumberOfItems": 100,
9       "DirectOffspring": 2,
10      "GroupPartners": [],
11      "PhenotypicFlexibility": 0.0,
12
13      "AssociatedSpecies": ["AlliedT"],
14      "IndirectOffspring": 1,
15      "FitnessVariationLimit": 0
16    },
17    {
18      "id": "SolitaryT",
19      "NumberOfItems": 100,
20      "DirectOffspring": 2,
21      "GroupPartners": [],
22      "PhenotypicFlexibility": 0.00,
23
24      "AssociatedSpecies": [],
25      "IndirectOffspring": 0,
26      "FitnessVariationLimit": 0
27    }
28  ]
29 }
30
```

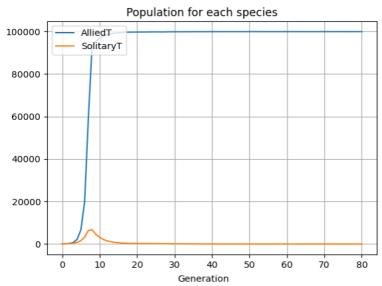

|                                                               |
|---------------------------------------------------------------|
| Allied turkeys only cooperate with themselves                 |
| Terminal Command or Rank: ae4.py Paper1/1Pavo3 --numGen=80 -p |

2

```
1 {
2   "NumberOfCells": 100,
3   "NumberOfRsrcsInEachCell": 1000,
4   "Distribution": "100n",
5   "species": [
6     {
7       "id": "AlliedT",
8       "NumberOfItems": 100,
9       "DirectOffspring": 2,
10      "GroupPartners": [],
11      "PhenotypicFlexibility": 0.0,
12
13      "AssociatedSpecies": ["AlliedT", "SolitaryT"],
14      "IndirectOffspring": 1,
15      "FitnessVariationLimit": 0
16    },
17    {
18      "id": "SolitaryT",
19      "NumberOfItems": 100,
20      "DirectOffspring": 2,
21      "GroupPartners": [],
22      "PhenotypicFlexibility": 0.00,
23
24      "AssociatedSpecies": ["AlliedT"],
25      "IndirectOffspring": -2,
26      "FitnessVariationLimit": 0
27    }
28  ]
29 }
30
```

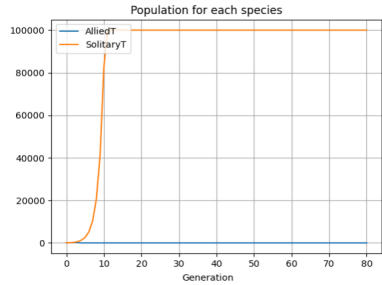

|                                                               |
|---------------------------------------------------------------|
| Allied turkeys cooperate with anyone                          |
| Terminal Command or Rank: ae4.py Paper1/1Pavo2 --numGen=80 -p |

Kin Selection

Adopting kin enhances inclusive fitness in asocial red squirrels

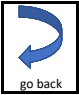

|                          |                                                         |
|--------------------------|---------------------------------------------------------|
| Training dataset         | [82                                                     |
| Initial State Name       | 1Squi.json                                              |
| Terminal Command or Rank | ae4.py Paper1/1Squi --numGen=2631 --saveExcel --verbose |
| Simulation data          | [82                                                     |

```
1 {
2   "NumberOfCells": 446,
3   "NumberOfRsrcsInEachCell": 6,
4   "Distribution": "3n",
5   "species": [
6     {
7       "id": "A",
8       "NumberOfItems": 10,
9       "DirectOffspring": 4,
10      "GroupPartners": [],
11      "PhenotypicFlexibility": 0.0,
12    },
13    "AssociatedSpecies": [],
14    "IndirectOffspring": 0,
15    "FitnessVariationLimit": 0
16  },
17  {
18    "id": "B",
19    "NumberOfItems": 10,
20    "DirectOffspring": 4,
21    "GroupPartners": [],
22    "PhenotypicFlexibility": 0.0,
23  },
24  "AssociatedSpecies": [],
25  "IndirectOffspring": 0,
26  "FitnessVariationLimit": 0
27  },
28  {
29    "id": "Q",
30    "NumberOfItems": 1,
31    "DirectOffspring": 1,
32    "GroupPartners": [],
33    "PhenotypicFlexibility": 0.0,
34  },
35  "AssociatedSpecies": ["A"],
36  "IndirectOffspring": 1,
37  "FitnessVariationLimit": 0
38  }
39 }
40
41
```

| Simulation data                           | Equivalence                            |
|-------------------------------------------|----------------------------------------|
| Litter of 4                               | DirectOffspring=4                      |
| In 2,230 litters 5 adoptions are observed | The "Q" factor appears every 446 cells |
| One territory                             | One cell                               |
| Dispersion: 3 diameters of territory (2D) | Thirteen cells (1D): Distribution = 3n |
| 10000 years                               | 2631 generations                       |

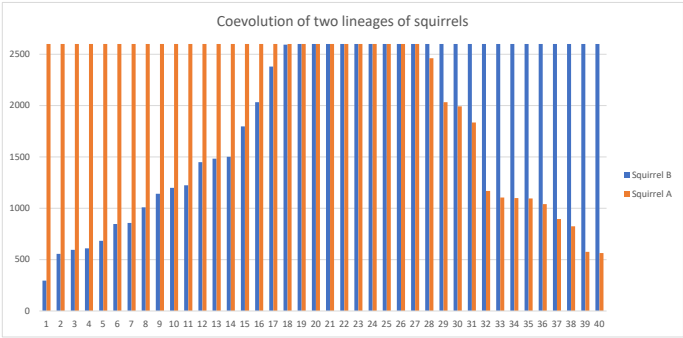

|                      |
|----------------------|
| Sex                  |
| The evolution of sex |

|                          |                                             |
|--------------------------|---------------------------------------------|
| Training dataset         | [87]                                        |
| Initial State Name       | 15ax2.json and 15ax3.json                   |
| Terminal Command or Rank | ax4.py Paper1/15ax2 and ax4.py Paper1/15ax3 |
| Simulation data          | [87]                                        |

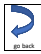[illegible]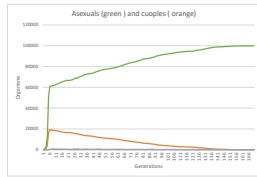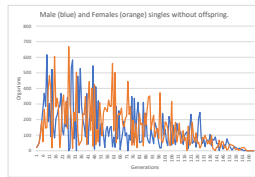

|                                          |                                                                                                                 |
|------------------------------------------|-----------------------------------------------------------------------------------------------------------------|
| There are no pathogens; asexuals prevail |                                                                                                                 |
| Terminal Command or Bash:                | <code>and my Pauc1715ax2 -verbose -setRandomSeed=0 -numGen=170 -species="3 NumberOfItems=0" -sizeOfSexal</code> |

[illegible]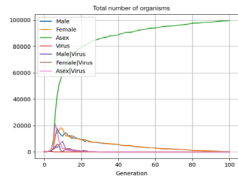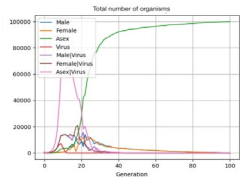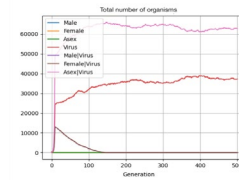

|                                                        |                                                                                                                                                                           |
|--------------------------------------------------------|---------------------------------------------------------------------------------------------------------------------------------------------------------------------------|
| The pathogen infects everyone equally: asexual prevail |                                                                                                                                                                           |
| Terminal Command or Rank (left):                       | <code>ask.py Paper175ax2 -verbose -setRandomSeed=0 -numGen=100 -g -species=2 -phenotypicFlexibility=0.5</code>                                                            |
| Terminal Command or Rank (center):                     | <code>ask.py Paper175ax2 -verbose -setRandomSeed=0 -numGen=100 -g -species=2 -phenotypicFlexibility=0.95 1:phenotypicFlexibility=0.95 2:phenotypicFlexibility=0.95</code> |
| Terminal Command or Rank (right):                      | <code>ask.py Paper175ax2 -verbose -setRandomSeed=0 -numGen=100 -g -species=2 -phenotypicFlexibility=1; 1:phenotypicFlexibility=1 2:phenotypicFlexibility=1</code>         |

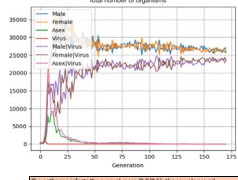

|                           |                                                                |
|---------------------------|----------------------------------------------------------------|
| Terminal Command or Rank: | ae4.py Paper1/15ax2 --verbose --wtRandomSeed=0 --numGen=170 -p |
|---------------------------|----------------------------------------------------------------|

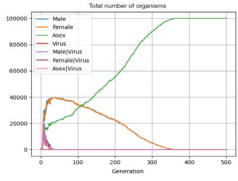

The pathogen infects the asexual more (0.75 vs 0.5): the asexuals prevail

|                           |                                                                                                       |
|---------------------------|-------------------------------------------------------------------------------------------------------|
| Terminal Command or Rink: | ls4.py Paper1/25a2 -verbose --setRandomSeed=0 --numGen=500 -p -species="2,phenotypicflexibility=0.75" |
|---------------------------|-------------------------------------------------------------------------------------------------------|

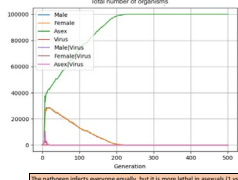

```
Terminal Command or Rink: ls -ls /var/lib/flatpak/exports/share/applications/ | grep -i "DirectOffspring=1"
```

[illegible]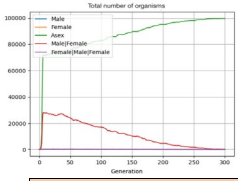

|                                                |                                   |
|------------------------------------------------|-----------------------------------|
| Asexuals prevail over sexuals even in polygamy |                                   |
| Terminal Command or Rank:                      | ae4.py Paper1/25ex3-p -numGen=300 |

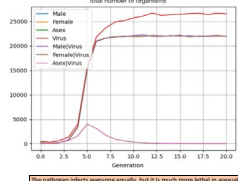

The pathogen infects everyone equally, but it is much more lethal in asexuals (2 vs 3 DirectOffspring): sexuals prevail

|                           |                                                                                                                                                                  |
|---------------------------|------------------------------------------------------------------------------------------------------------------------------------------------------------------|
| Terminal Command or Rank: | as4.py Paper1/15sex2 --verbose --setRandomSeed=0 --numGen=20 -p --species="2.PhenotypicToxicity=0.5,4.DirectOffspring=3,5.DirectOffspring=3,6.DirectOffspring=1" |
|---------------------------|------------------------------------------------------------------------------------------------------------------------------------------------------------------|

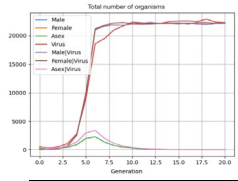

The pathogen infects a little more (0.5 vs 0.6) and is a little more lethal in asexuals (1 vs 2 DirectOffspring): asexuals prevail

Terminal Command or Rank: `and pay Paper/135x2 -verbose -setRandomSeed=0 -numGen=20 -g -species="2,PhenotypicFlexibility:0.6,DirectOffspring=3.5,DirectOffspring=3.6,DirectOffspring=1"`

Fisher's principle

The 1:1 ratio is the evolutionarily stable strategy (ESS)

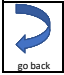

|                          |                                                |
|--------------------------|------------------------------------------------|
| Training dataset         | [93]                                           |
| Initial State Name       | 1Fish.json                                     |
| Terminal Command or Rank | ae4.py Paper1/1Fish --numGen=30 -p --saveExcel |
| Simulation data          |                                                |

```
1 {
2   "NumberOfCells": 10,
3   "NumberOfRsrcsInEachCell": 10000,
4   "Distribution": "100n",
5   "species": [
6     {
7       "id": "Male=",
8       "NumberOfItems": 10000,
9       "DirectOffspring": 0,
10      "GroupPartners": [],
11      "PhenotypicFlexibility": 0.0,
12    },
13    "AssociatedSpecies": ["Female="],
14    "IndirectOffspring": 3,
15    "FitnessVariationLimit": 0
16  },
17  {
18    "id": "Female=",
19    "NumberOfItems": 10000,
20    "DirectOffspring": 0,
21    "GroupPartners": [],
22    "PhenotypicFlexibility": 0.0,
23  },
24  "AssociatedSpecies": ["Male="],
25  "IndirectOffspring": 3,
26  "FitnessVariationLimit": 0
27  },
28  {
29    "id": "Male-",
30    "NumberOfItems": 10000,
31    "DirectOffspring": 0,
32    "GroupPartners": [],
33    "PhenotypicFlexibility": 0.0,
34  },
35  "AssociatedSpecies": ["Female-"],
36  "IndirectOffspring": 2,
37  "FitnessVariationLimit": 0
38  },
39  {
40    "id": "Female-",
41    "NumberOfItems": 10000,
42    "DirectOffspring": 0,
43    "GroupPartners": [],
44    "PhenotypicFlexibility": 0.0,
45  },
46  "AssociatedSpecies": ["Male+"],
47  "IndirectOffspring": 4,
48  "FitnessVariationLimit": 0
49  },
50  {
51    "id": "Male+",
52    "NumberOfItems": 10000,
53    "DirectOffspring": 0,
54    "GroupPartners": [],
55    "PhenotypicFlexibility": 0.0,
56  },
57  "AssociatedSpecies": ["Female+"],
58  "IndirectOffspring": 4,
59  "FitnessVariationLimit": 0
60  },
61  {
62    "id": "Female+",
63    "NumberOfItems": 10000,
64    "DirectOffspring": 0,
65    "GroupPartners": [],
66    "PhenotypicFlexibility": 0.0,
67  },
68  "AssociatedSpecies": ["Male+"],
69  "IndirectOffspring": 2,
70  "FitnessVariationLimit": 0
71  },
72  }
73 }
```

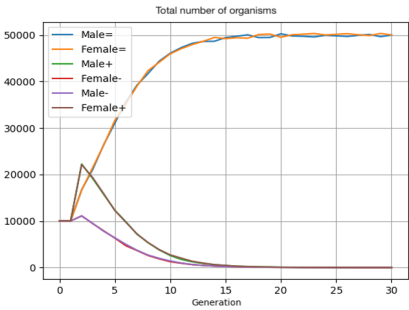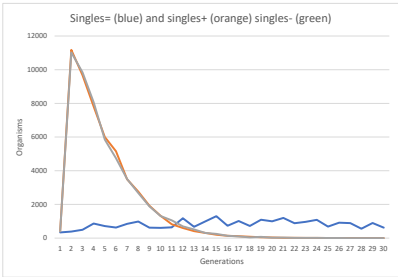

Proto-Cooperation



|                          |                      |
|--------------------------|----------------------|
| Training dataset         | /52                  |
| Initial State Name       | 1Proto.json          |
| Terminal Command or Rank | ae4.py Paper1/1Proto |
| Simulation data          |                      |

1

```
1Proto.json
1
2
3
4
5
6
7
8
9
10
11
12
13
14
15
16
17
18
19
20
21
22
23
24
25
26
27
28
29
30
31
32
33
34
35
36
37
38
{
  "NumberOfCells": 100,
  "NumberOfRsrcsInEachCell": 100,
  "Distribution": "100n",
  "species": [
    {
      "id": "SP1",
      "NumberOfItems": 100,
      "DirectOffspring": 3,
      "GroupPartners": [],
      "PhenotypicFlexibility": 0.0,
      "AssociatedSpecies": ["SP2"],
      "IndirectOffspring": 1,
      "FitnessVariationLimit": 0
    },
    {
      "id": "SP2",
      "NumberOfItems": 100,
      "DirectOffspring": 3,
      "GroupPartners": [],
      "PhenotypicFlexibility": 0.0,
      "AssociatedSpecies": ["SP1"],
      "IndirectOffspring": 1,
      "FitnessVariationLimit": 0
    },
    {
      "id": "SP3",
      "NumberOfItems": 100,
      "DirectOffspring": 3,
      "GroupPartners": [],
      "PhenotypicFlexibility": 0.0,
      "AssociatedSpecies": [],
      "IndirectOffspring": 0,
      "FitnessVariationLimit": 0
    }
  ]
}
```

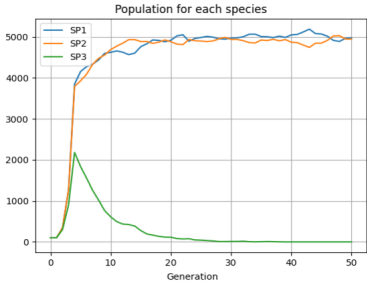

|                                                                                            |                                     |
|--------------------------------------------------------------------------------------------|-------------------------------------|
| Species SP1 and SP2 obtain one more offspring when they collaborate, they prevail over SP3 |                                     |
| Terminal Command or Rank:                                                                  | ae4.py Paper1/1Proto -p --numGen=50 |
